# Supplementary material
Source: PubMed Central journal article supplement (PMC2000522)
Supplement: pnas_0702241104_8.pdf [file pnas_0702241104_8.pdf]

**SI Table 2. Gordon-Schaefer comparison**

|                                           | Clark's Model                       |       | Graph of Lobster Model with Clark's Assumptions |
|-------------------------------------------|-------------------------------------|-------|-------------------------------------------------|
|                                           | Partials                            | Graph |                                                 |
| Reference                                 |                                     |       |                                                 |
| Change $p$<br>(decrease $p$<br>in graphs) | $\frac{\partial E}{\partial p} > 0$ |       |                                                 |
| Change $c$<br>(increase $c$<br>in graphs) | $\frac{\partial E}{\partial c} < 0$ |       |                                                 |
| Change $r$<br>(decrease $r$<br>in graphs) | $\frac{\partial E}{\partial r} > 0$ |       |                                                 |
| Change $K$<br>(decrease $K$<br>in graphs) | $\frac{\partial E}{\partial K} > 0$ |       |                                                 |
