# Supplementary material
Source: PubMed Central journal article supplement (PMC2000522)
Supplement: pnas_0702241104_9.pdf [file pnas_0702241104_9.pdf]

SI Table 3. Decision sequence

| Day | Strategy | Catch Rate |
|-----|----------|------------|
| 2   | stay     | 5          |
| 3   | imitate  | 4          |
| 4   | stay     | 3          |
| 5   | stay     | 2          |
| 6   | stay     | 2          |
| 7   | imitate  | 5          |
| 8   | stay     | 3          |
| 9   | imitate  | 2          |
| 10  | stay     | 5          |
| 11  | stay     | 5          |
| 12  | stay     | 5          |
| 13  | stay     | 3          |
| 14  | imitate  | 3          |
| 15  | stay     | 2          |
| 16  | explore  | 5          |
| 17  | imitate  | 1          |
| 18  | explore  | 5          |
| 19  | imitate  | 5          |
| 20  | stay     | 1          |
| 21  | stay     | 4          |
| 22  | stay     | 5          |
| 23  | explore  | 5          |
| 24  | stay     | 5          |
| 25  | stay     | 5          |
| 26  | stay     | 5          |
| 27  | stay     | 5          |
| 28  | stay     | 4          |
| 29  | stay     | 4          |

| Day | Strategy | Catch Rate |
|-----|----------|------------|
| 30  | imitate  | 1          |
| 31  | explore  | 5          |
| 32  | stay     | 5          |
| 33  | stay     | 5          |
| 34  | imitate  | 0          |
| 35  | explore  | 3          |
| 36  | stay     | 5          |
| 37  | stay     | 2          |
| 38  | stay     | 5          |
| 39  | stay     | 5          |
| 40  | stay     | 5          |
| 41  | stay     | 5          |
| 42  | stay     | 5          |
| 43  | stay     | 5          |
| 44  | stay     | 2          |
| 45  | stay     | 3          |
| 46  | stay     | 5          |
| 47  | stay     | 5          |
| 48  | stay     | 1          |
| 49  | explore  | 3          |
| 50  | stay     | 2          |
| 51  | explore  | 1          |
| 52  | explore  | 0          |
| 53  | stay     | 0          |
| 54  | explore  | 5          |
| 55  | stay     | 4          |
| 56  | stay     | 5          |
| 57  | stay     | 5          |

| Day | Strategy | Catch Rate |
|-----|----------|------------|
| 58  | stay     | 5          |
| 59  | stay     | 4          |
| 60  | imitate  | 2          |
| 61  | explore  | 1          |
| 62  | explore  | 5          |
| 63  | stay     | 3          |
| 64  | explore  | 0          |
| 65  | stay     | 5          |
| 66  | stay     | 5          |
| 67  | stay     | 5          |
| 68  | stay     | 5          |
| 69  | stay     | 1          |
| 70  | stay     | 5          |
| 71  | stay     | 5          |
| 72  | stay     | 5          |
| 73  | stay     | 4          |
| 74  | stay     | 3          |
| 75  | stay     | 5          |
| 76  | stay     | 3          |
| 77  | stay     | 3          |
| 78  | stay     | 3          |
| 79  | stay     | 5          |
| 80  | stay     | 3          |
| 81  | explore  | 0          |
| 82  | stay     | 2          |
| 83  | stay     | 5          |
| 84  | stay     | 4          |
| 85  | stay     | 2          |

| Day | Strategy | Catch Rate |
|-----|----------|------------|
| 86  | explore  | 2          |
| 87  | stay     | 3          |
| 88  | stay     | 4          |
| 89  | stay     | 2          |
| 90  | stay     | 2          |
| 91  | stay     | 2          |
| 92  | explore  | 0          |
| 93  | stay     | 1          |
| 94  | explore  | 5          |
| 95  | stay     | 5          |
| 96  | stay     | 1          |
| 97  | stay     | 5          |
| 98  | stay     | 2          |
| 99  | stay     | 1          |
| 100 | stay     | 1          |
| 101 | stay     | 2          |
| 102 | stay     | 1          |
| 103 | stay     | 5          |
| 104 | stay     | 1          |
| 105 | explore  | 5          |
| 106 | stay     | 5          |
| 107 | stay     | 5          |
| 108 | stay     | 5          |
| 109 | stay     | 4          |
| 110 | stay     | 5          |
| 111 | stay     | 5          |

| Day | Strategy | Catch Rate |
|-----|----------|------------|
| 112 | stay     | 5          |
| 113 | stay     | 5          |
| 114 | stay     | 5          |
| 115 | stay     | 5          |
| 116 | stay     | 5          |
| 117 | stay     | 5          |
| 118 | stay     | 4          |
| 119 | imitate  | 0          |
| 120 | stay     | 2          |
| 121 | stay     | 0          |
| 122 | stay     | 1          |
| 123 | stay     | 2          |
| 124 | explore  | 0          |
| 125 | explore  | 0          |
| 126 | stay     | 1          |
| 127 | explore  | 5          |
| 128 | stay     | 4          |
| 129 | stay     | 3          |
| 130 | explore  | 1          |
| 131 | explore  | 0          |
| 132 | explore  | 0          |
| 133 | stay     | 0          |
| 134 | stay     | 0          |
| 135 | explore  | 0          |
| 136 | stay     | 0          |
| 137 | stay     | 0          |

| Day | Strategy | Catch Rate |
|-----|----------|------------|
| 138 | explore  | 0          |
| 139 | explore  | 0          |
| 140 | stay     | 2          |
| 141 | stay     | 2          |
| 142 | stay     | 0          |
| 143 | explore  | 2          |
| 144 | stay     | 1          |
| 145 | explore  | 1          |
| 146 | stay     | 2          |
| 147 | stay     | 1          |
| 148 | explore  | 1          |
| 149 | stay     | 1          |
| 150 | explore  | 3          |
| 151 | stay     | 1          |
| 152 | stay     | 1          |
| 153 | stay     | 1          |
| 154 | stay     | 1          |
| 155 | stay     | 1          |
| 156 | explore  | 0          |
| 157 | stay     | 5          |
| 158 | stay     | 4          |
| 159 | stay     | 3          |
| 160 | explore  | 5          |
| 161 | stay     | 5          |
| 162 | stay     | 5          |
| 163 | stay     | 5          |

| Day | Strategy | Catch Rate |
|-----|----------|------------|
| 164 | stay     | 5          |
| 165 | stay     | 5          |
| 166 | stay     | 5          |
| 167 | stay     | 5          |
| 168 | stay     | 3          |
| 169 | stay     | 3          |
| 170 | stay     | 4          |
| 171 | stay     | 5          |
| 172 | stay     | 5          |
| 173 | stay     | 5          |
| 174 | stay     | 5          |
| 175 | stay     | 3          |
| 176 | stay     | 2          |
| 177 | explore  | 0          |
| 178 | explore  | 0          |
| 179 | stay     | 3          |
| 180 | stay     | 2          |
| 181 | explore  | 0          |
| 182 | stay     | 0          |
| 183 | stay     | 0          |
| 184 | stay     | 0          |
| 185 | stay     | 0          |
| 186 | stay     | 0          |
| 187 | stay     | 0          |
| 188 | stay     | 0          |
| 189 | stay     | 0          |

| Day | Strategy | Catch Rate |
|-----|----------|------------|
| 190 | explore  | 0          |
| 191 | stay     | 0          |
| 192 | stay     | 1          |
| 193 | stay     | 0          |
| 194 | explore  | 5          |
| 195 | stay     | 0          |
| 196 | explore  | 0          |
| 197 | stay     | 0          |
| 198 | explore  | 0          |
| 199 | explore  | 0          |
| 200 | stay     | 0          |
| 201 | explore  | 5          |
| 202 | stay     | 3          |
| 203 | explore  | 0          |
| 204 | stay     | 0          |
| 205 | stay     | 0          |
| 206 | explore  | 0          |
| 207 | stay     | 0          |
| 208 | stay     | 0          |
| 209 | stay     | 2          |
| 210 | stay     | 3          |
| 211 | stay     | 0          |
| 212 | stay     | 0          |
| 213 | stay     | 0          |
| 214 | stay     | 0          |
| 215 | stay     | 0          |

| Day | Strategy | Catch Rate |
|-----|----------|------------|
| 216 | explore  | 0          |
| 217 | stay     | 0          |
| 218 | imitate  | 5          |
| 219 | stay     | 2          |
| 220 | explore  | 2          |
| 221 | stay     | 1          |
| 222 | imitate  | 2          |
| 223 | stay     | 1          |
| 224 | stay     | 3          |
| 225 | stay     | 2          |
| 226 | stay     | 3          |
| 227 | stay     | 2          |
| 228 | stay     | 1          |
| 229 | stay     | 1          |
| 230 | stay     | 1          |
| 231 | stay     | 0          |
| 232 | stay     | 0          |
| 233 | stay     | 0          |
| 234 | stay     | 0          |
| 235 | stay     | 0          |
| 236 | explore  | 0          |
| 237 | stay     | 0          |
| 238 | imitate  | 5          |
| 239 | stay     | 1          |
| 240 | stay     | 5          |
