# Supplementary material
Source: PubMed Central journal article supplement (PMC2000522)
Supplement: pnas_0702241104_10.pdf [file pnas_0702241104_10.pdf]

SI Table 4. Decision sequence with no communication

| Day | Strategy | Catch Rate | Day | Strategy | Catch Rate | Day | Strategy | Catch Rate |
|-----|----------|------------|-----|----------|------------|-----|----------|------------|
| 2   | stay     | 2          | 30  | stay     | 5          | 58  | stay     | 5          |
| 3   | stay     | 2          | 31  | stay     | 3          | 59  | stay     | 5          |
| 4   | stay     | 1          | 32  | stay     | 2          | 60  | stay     | 5          |
| 5   | stay     | 1          | 33  | stay     | 5          | 61  | stay     | 5          |
| 6   | stay     | 1          | 34  | stay     | 5          | 62  | stay     | 1          |
| 7   | stay     | 1          | 35  | stay     | 5          | 63  | stay     | 5          |
| 8   | stay     | 1          | 36  | stay     | 5          | 64  | stay     | 5          |
| 9   | stay     | 0          | 37  | stay     | 3          | 65  | stay     | 5          |
| 10  | stay     | 1          | 38  | stay     | 5          | 66  | stay     | 3          |
| 11  | stay     | 0          | 39  | stay     | 5          | 67  | stay     | 5          |
| 12  | stay     | 1          | 40  | stay     | 5          | 68  | stay     | 3          |
| 13  | stay     | 0          | 41  | stay     | 5          | 69  | stay     | 2          |
| 14  | explore  | 5          | 42  | stay     | 2          | 70  | stay     | 2          |
| 15  | explore  | 3          | 43  | stay     | 5          | 71  | stay     | 1          |
| 16  | stay     | 4          | 44  | stay     | 3          | 72  | stay     | 5          |
| 17  | stay     | 5          | 45  | stay     | 5          | 73  | stay     | 5          |
| 18  | stay     | 5          | 46  | stay     | 5          | 74  | stay     | 5          |
| 19  | stay     | 5          | 47  | stay     | 5          | 75  | stay     | 1          |
| 20  | stay     | 5          | 48  | stay     | 5          | 76  | explore  | 3          |
| 21  | stay     | 5          | 49  | stay     | 5          | 77  | stay     | 5          |
| 22  | stay     | 4          | 50  | stay     | 5          | 78  | stay     | 3          |
| 23  | stay     | 3          | 51  | stay     | 5          | 79  | stay     | 2          |
| 24  | stay     | 5          | 52  | stay     | 2          | 80  | stay     | 5          |
| 25  | stay     | 5          | 53  | stay     | 5          | 81  | stay     | 2          |
| 26  | stay     | 5          | 54  | stay     | 3          | 82  | stay     | 2          |
| 27  | stay     | 3          | 55  | stay     | 3          | 83  | stay     | 5          |
| 28  | stay     | 4          | 56  | stay     | 1          | 84  | stay     | 2          |
| 29  | stay     | 5          | 57  | explore  | 5          | 85  | stay     | 3          |

| Day | Strategy | Catch Rate |
|-----|----------|------------|
| 86  | stay     | 1          |
| 87  | explore  | 3          |
| 88  | stay     | 1          |
| 89  | explore  | 2          |
| 90  | stay     | 2          |
| 91  | stay     | 3          |
| 92  | stay     | 2          |
| 93  | stay     | 5          |
| 94  | stay     | 3          |
| 95  | stay     | 2          |
| 96  | stay     | 2          |
| 97  | stay     | 2          |
| 98  | stay     | 3          |
| 99  | stay     | 2          |
| 100 | stay     | 2          |
| 101 | stay     | 2          |
| 102 | stay     | 4          |
| 103 | stay     | 5          |
| 104 | stay     | 4          |
| 105 | stay     | 5          |
| 106 | stay     | 5          |
| 107 | stay     | 5          |
| 108 | stay     | 5          |
| 109 | stay     | 5          |
| 110 | stay     | 2          |
| 111 | stay     | 2          |

| Day | Strategy | Catch Rate |
|-----|----------|------------|
| 112 | stay     | 4          |
| 113 | stay     | 2          |
| 114 | stay     | 3          |
| 115 | stay     | 1          |
| 116 | stay     | 2          |
| 117 | stay     | 5          |
| 118 | stay     | 5          |
| 119 | stay     | 5          |
| 120 | stay     | 3          |
| 121 | stay     | 5          |
| 122 | stay     | 5          |
| 123 | stay     | 5          |
| 124 | stay     | 5          |
| 125 | stay     | 5          |
| 126 | stay     | 5          |
| 127 | stay     | 4          |
| 128 | stay     | 3          |
| 129 | stay     | 3          |
| 130 | stay     | 3          |
| 131 | stay     | 5          |
| 132 | stay     | 5          |
| 133 | stay     | 2          |
| 134 | explore  | 0          |
| 135 | stay     | 0          |
| 136 | stay     | 0          |
| 137 | stay     | 0          |

| Day | Strategy | Catch Rate |
|-----|----------|------------|
| 138 | stay     | 0          |
| 139 | stay     | 0          |
| 140 | stay     | 0          |
| 141 | stay     | 0          |
| 142 | stay     | 0          |
| 143 | explore  | 1          |
| 144 | stay     | 2          |
| 145 | stay     | 4          |
| 146 | stay     | 5          |
| 147 | stay     | 3          |
| 148 | stay     | 5          |
| 149 | stay     | 5          |
| 150 | stay     | 3          |
| 151 | stay     | 2          |
| 152 | stay     | 2          |
| 153 | stay     | 2          |
| 154 | stay     | 5          |
| 155 | stay     | 5          |
| 156 | stay     | 5          |
| 157 | stay     | 5          |
| 158 | stay     | 1          |
| 159 | stay     | 2          |
| 160 | stay     | 1          |
| 161 | stay     | 4          |
| 162 | stay     | 3          |
| 163 | stay     | 3          |

| Day | Strategy | Catch Rate |
|-----|----------|------------|
| 164 | stay     | 5          |
| 165 | stay     | 3          |
| 166 | stay     | 3          |
| 167 | stay     | 3          |
| 168 | stay     | 4          |
| 169 | stay     | 5          |
| 170 | stay     | 5          |
| 171 | stay     | 5          |
| 172 | stay     | 5          |
| 173 | stay     | 5          |
| 174 | stay     | 3          |
| 175 | stay     | 3          |
| 176 | stay     | 3          |
| 177 | stay     | 5          |
| 178 | stay     | 5          |
| 179 | stay     | 5          |
| 180 | stay     | 4          |
| 181 | stay     | 4          |
| 182 | stay     | 4          |
| 183 | stay     | 3          |
| 184 | stay     | 2          |
| 185 | stay     | 2          |
| 186 | explore  | 2          |
| 187 | stay     | 2          |
| 188 | stay     | 3          |
| 189 | stay     | 1          |

| Day | Strategy | Catch Rate |
|-----|----------|------------|
| 190 | explore  | 1          |
| 191 | stay     | 3          |
| 192 | stay     | 2          |
| 193 | stay     | 1          |
| 194 | stay     | 0          |
| 195 | stay     | 0          |
| 196 | stay     | 0          |
| 197 | stay     | 0          |
| 198 | stay     | 0          |
| 199 | stay     | 0          |
| 200 | stay     | 0          |
| 201 | stay     | 0          |
| 202 | explore  | 1          |
| 203 | explore  | 2          |
| 204 | explore  | 5          |
| 205 | stay     | 5          |
| 206 | stay     | 1          |
| 207 | stay     | 3          |
| 208 | stay     | 3          |
| 209 | stay     | 5          |
| 210 | stay     | 5          |
| 211 | stay     | 5          |
| 212 | stay     | 5          |
| 213 | stay     | 5          |
| 214 | stay     | 3          |
| 215 | stay     | 5          |

| Day | Strategy | Catch Rate |
|-----|----------|------------|
| 216 | stay     | 2          |
| 217 | stay     | 5          |
| 218 | stay     | 5          |
| 219 | stay     | 5          |
| 220 | stay     | 5          |
| 221 | stay     | 5          |
| 222 | stay     | 5          |
| 223 | stay     | 5          |
| 224 | stay     | 5          |
| 225 | stay     | 1          |
| 226 | explore  | 0          |
| 227 | stay     | 2          |
| 228 | stay     | 1          |
| 229 | stay     | 1          |
| 230 | explore  | 1          |
| 231 | explore  | 0          |
| 232 | explore  | 0          |
| 233 | explore  | 0          |
| 234 | explore  | 0          |
| 235 | explore  | 5          |
| 236 | stay     | 3          |
| 237 | stay     | 5          |
| 238 | stay     | 2          |
| 239 | stay     | 5          |
| 240 | stay     | 4          |
