# Supplementary material
Source: PubMed Central journal article supplement (PMC2000522)
Supplement: pnas_0702241104_11.pdf [file pnas_0702241104_11.pdf]

SI Table 5. Groups and diversity

| Groups                              | Year 10 | Year 20 | Year 30 | Year 40 | Year 50 |
|-------------------------------------|---------|---------|---------|---------|---------|
| (1, 4, 18)                          | +       | +       | +       | +       | +       |
| (20, 25)                            | +       | +       | +       | +       | +       |
| (10)                                | +       | +       | +       | +       | +       |
| (17, 24, 21)                        | +       | +       | +       | +       | +       |
| (12, 27)                            | +       | +       | +       | +       | +       |
| (3, 28) (3, 28, 22, 11) (3, 28, 22) | +       | +       | +       | +       | +       |
| (22)                                | +       | +       | +       |         |         |
| (11)                                | +       | +       | +       |         | +       |
| (2) (2, 13)                         | +       | +       | +       | +       | +       |
| (6)                                 | +       | +       |         |         | +       |
| (13, 26, 29) (6, 26, 29)            | +       | +       | +       | +       | +       |
| (5, 15)                             | +       | +       | +       | +       | +       |
| (7, 8, 30, 19,) (7, 8, 30, 19, 23)  | +       | +       | +       | +       | +       |
| (9)                                 | +       | +       | +       | +       | +       |
| (23)                                | +       | +       | +       | +       |         |
| (14, 16)                            | +       | +       | +       | +       | +       |
