# Supplementary material
Source: PubMed Central journal article supplement (PMC2000522)

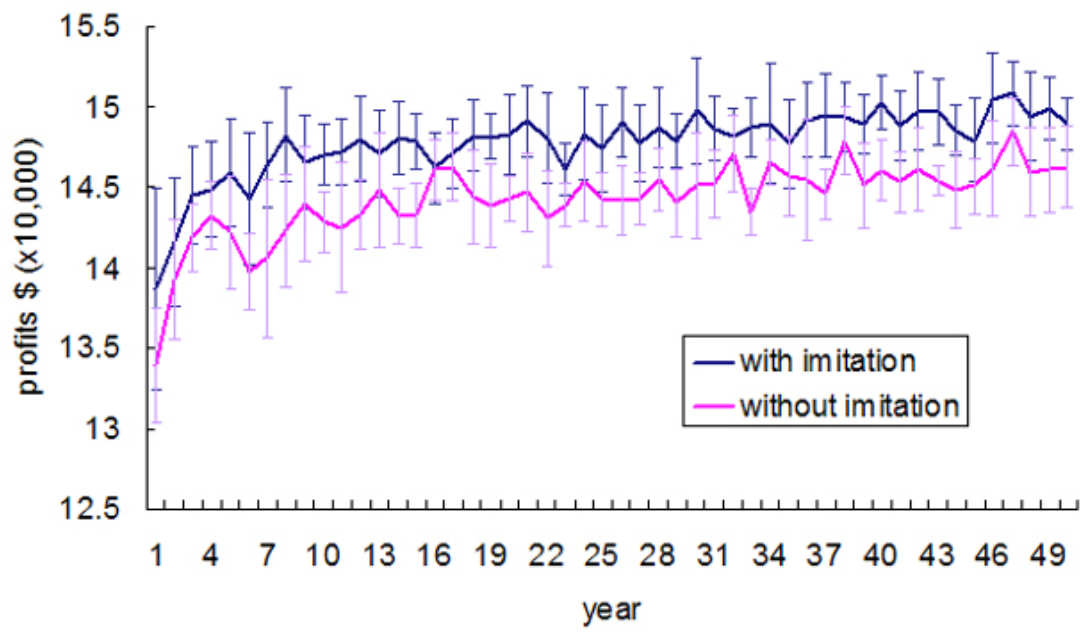

Supplement: pnas_0702241104_1.pdf [file pnas_0702241104_1.pdf]

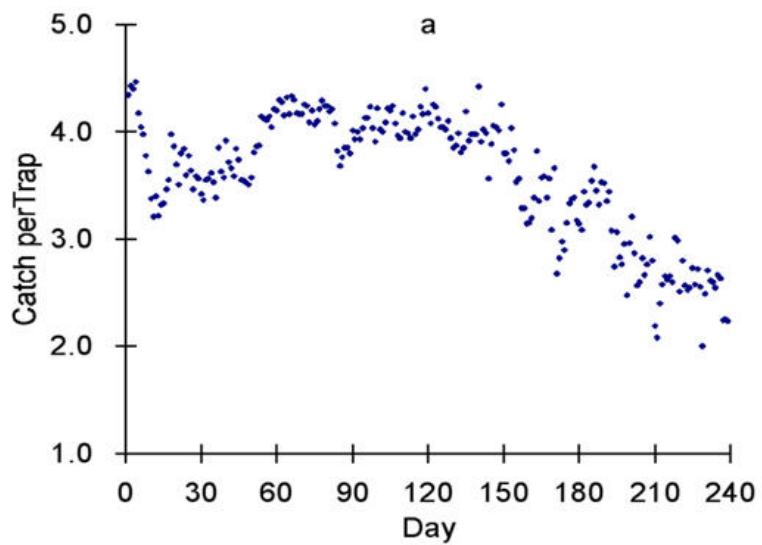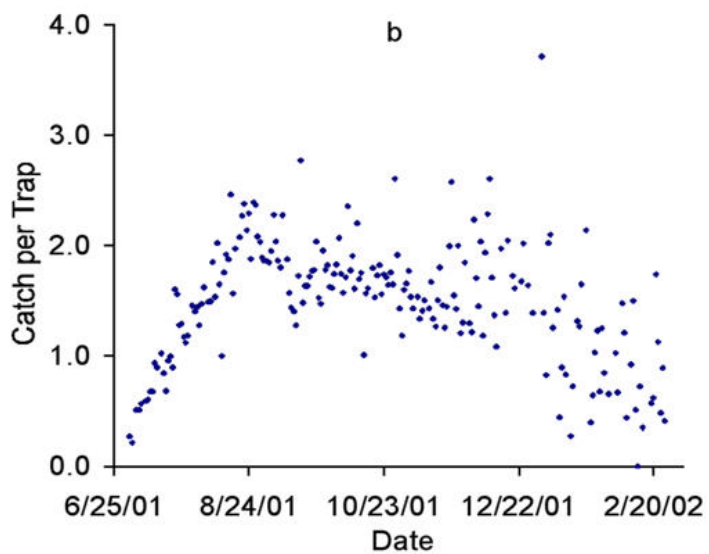

Supplement: pnas_0702241104_2.pdf [file pnas_0702241104_2.pdf]

**a**

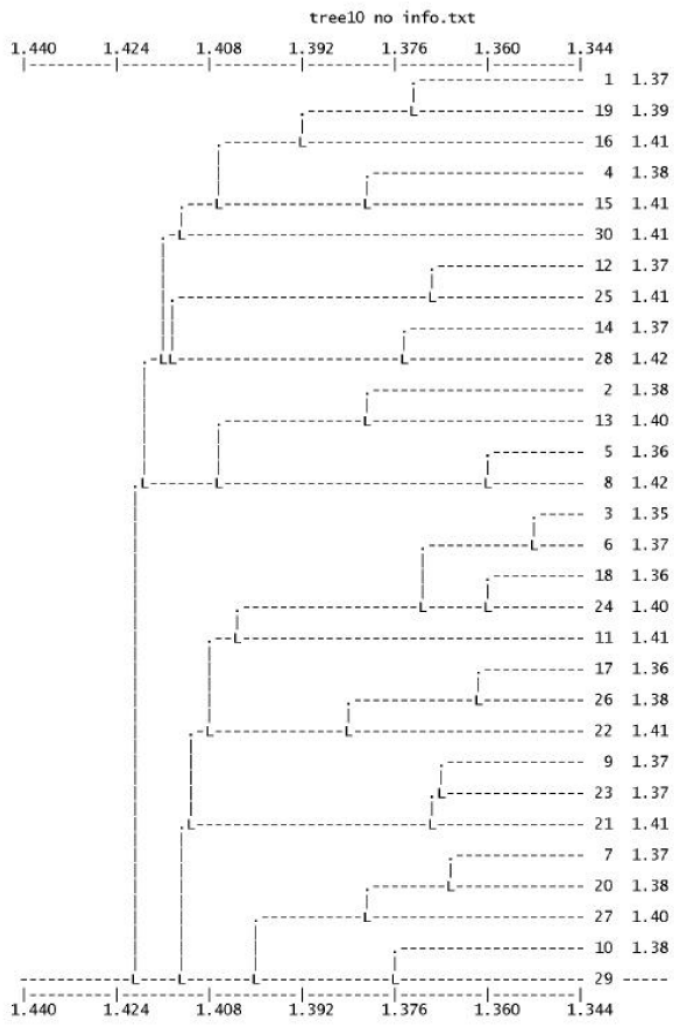

**b**

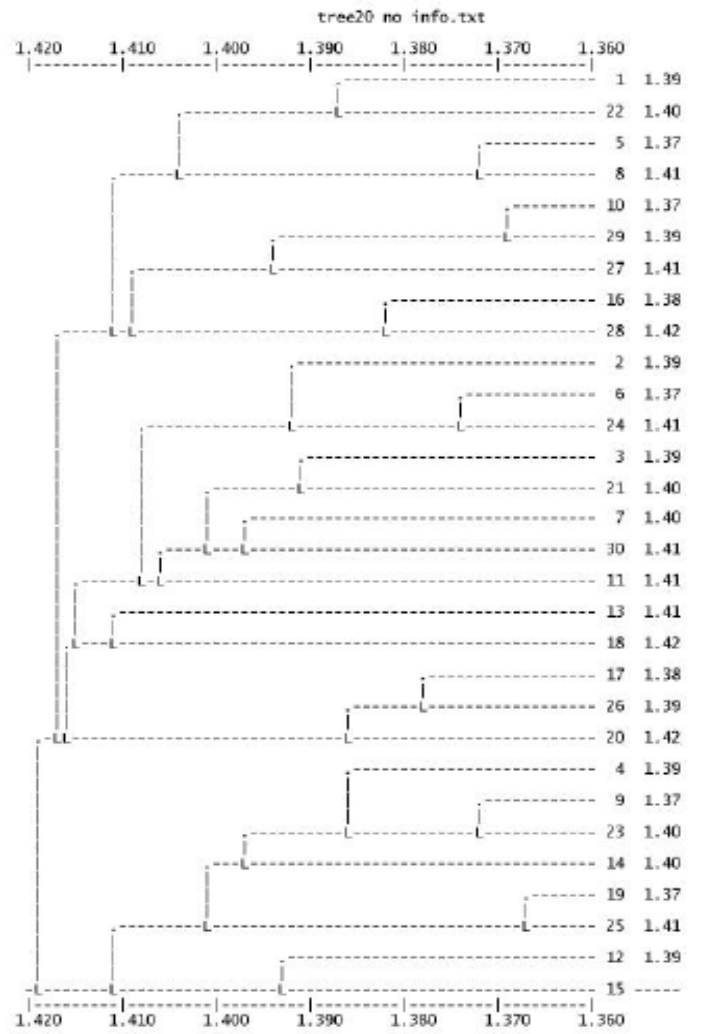

**c**

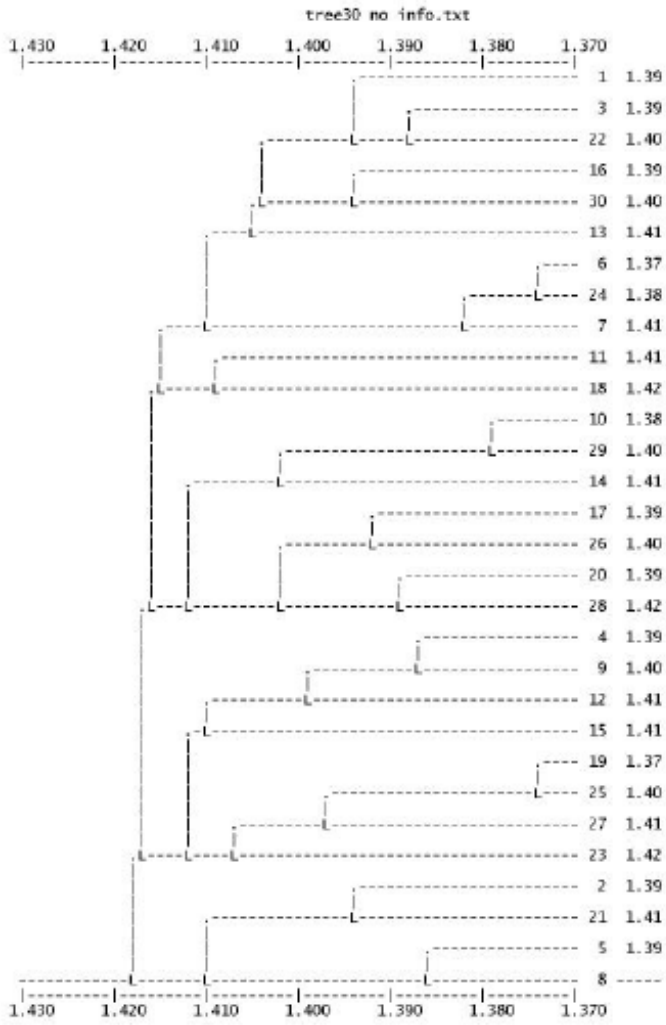

**d**

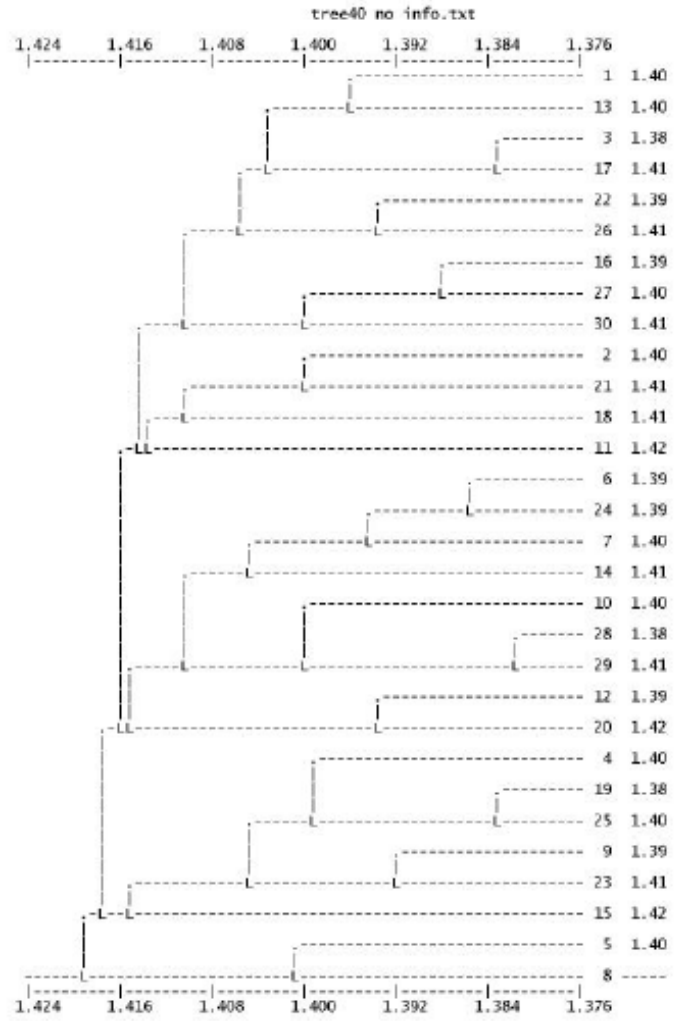

e

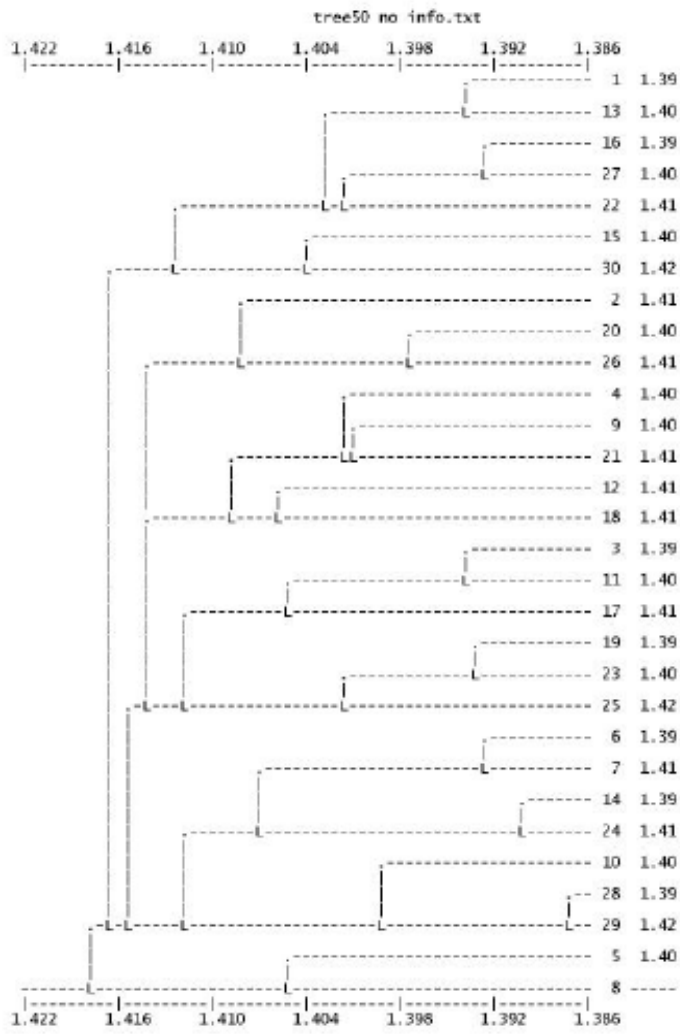

f

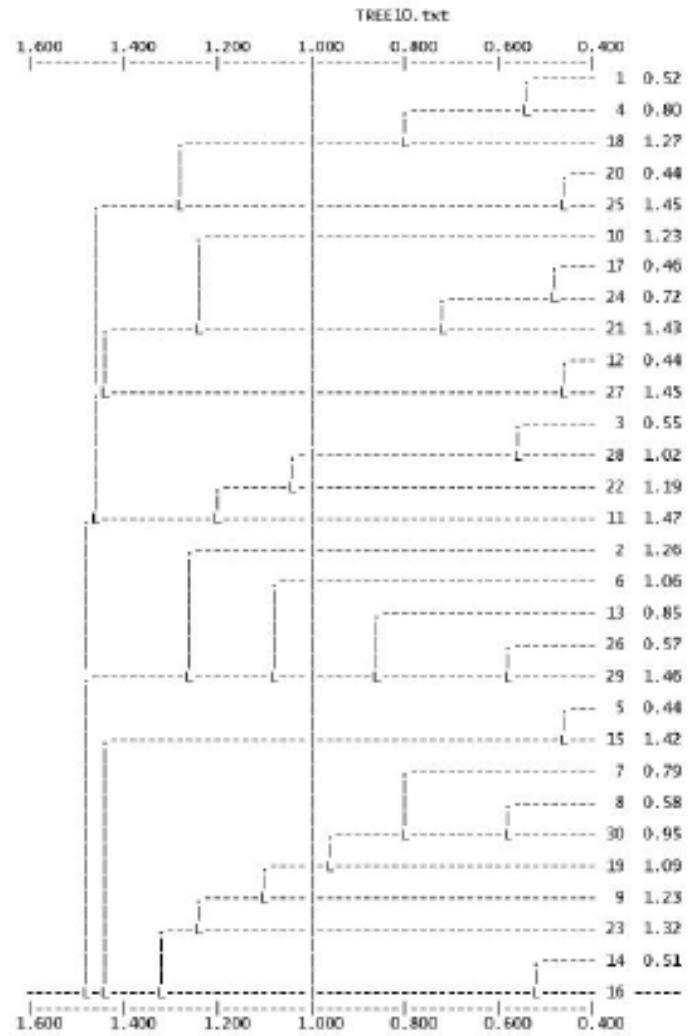

g

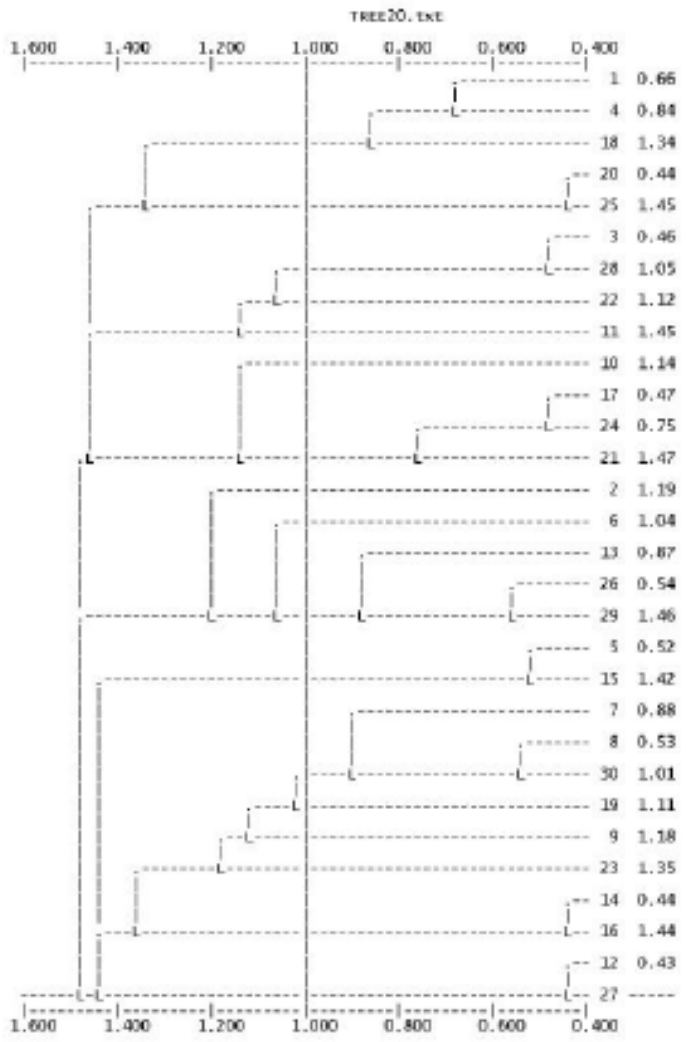

h

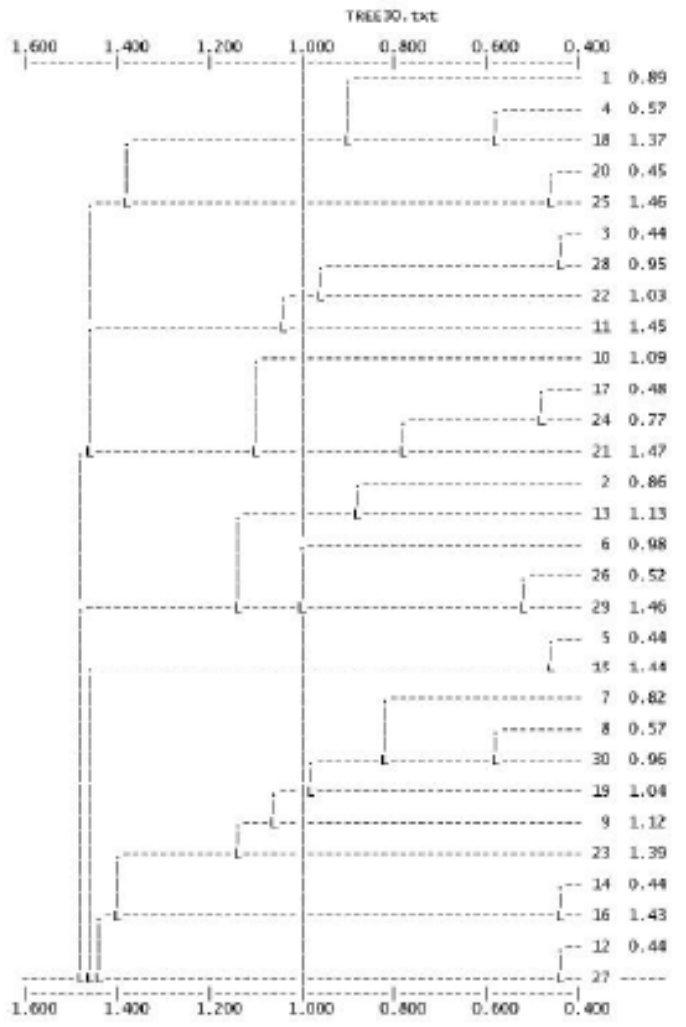

i

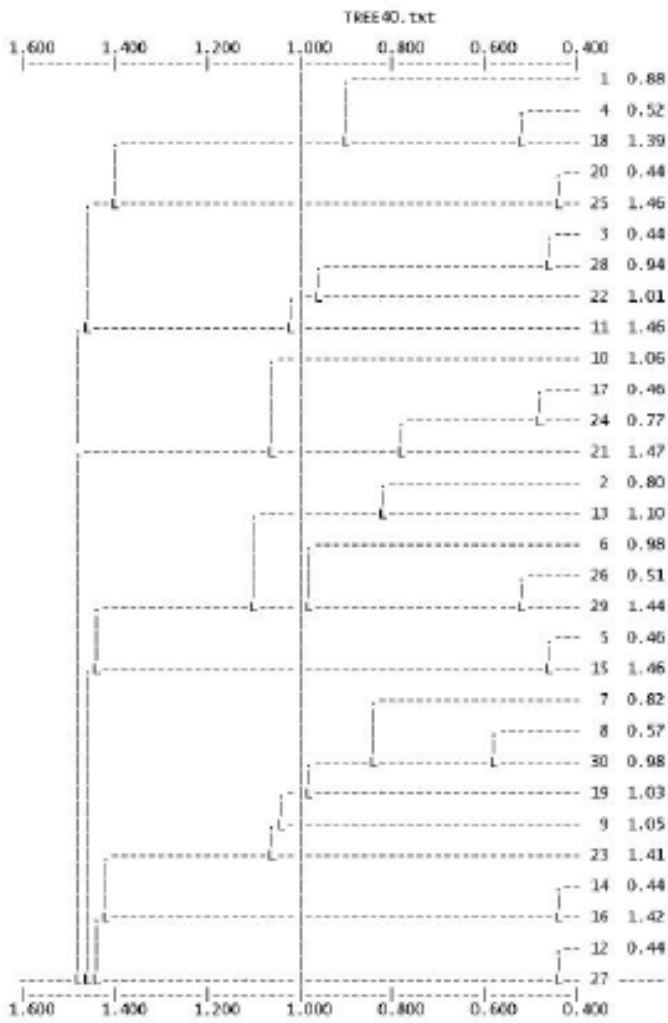

j

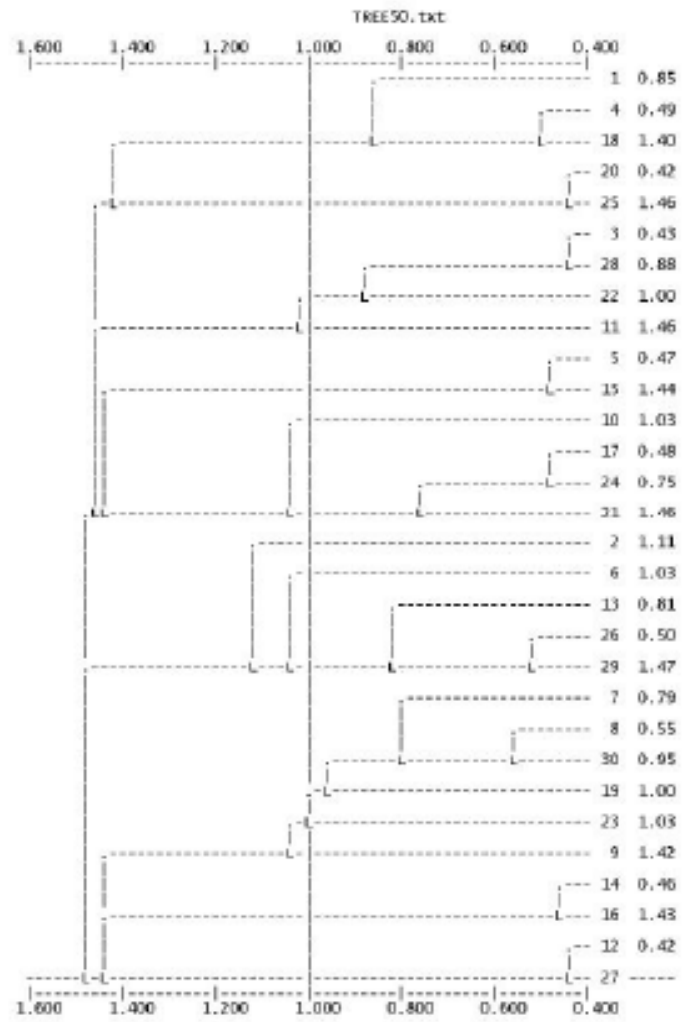

Supplement: pnas_0702241104_3.pdf [file pnas_0702241104_3.pdf]

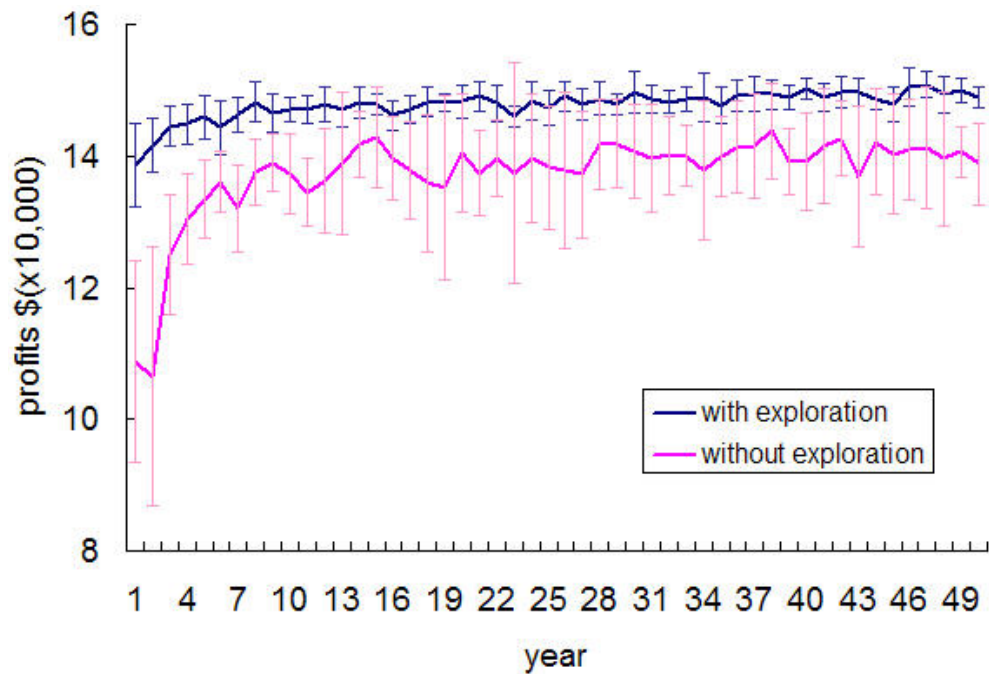

Supplement: pnas_0702241104_4.pdf [file pnas_0702241104_4.pdf]

**a**

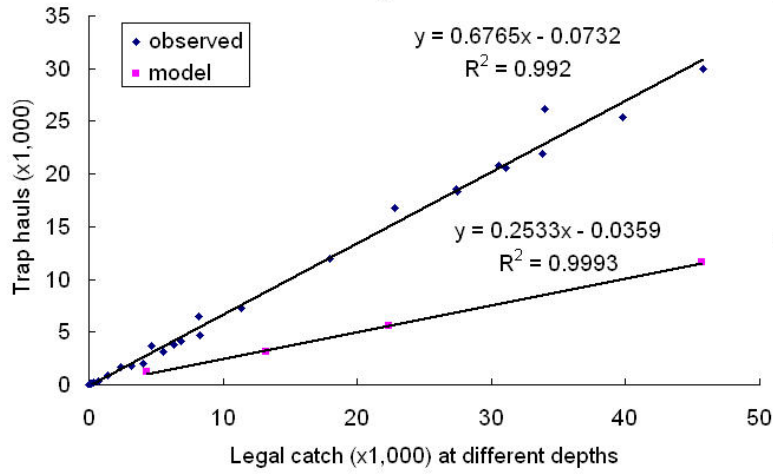

**b**

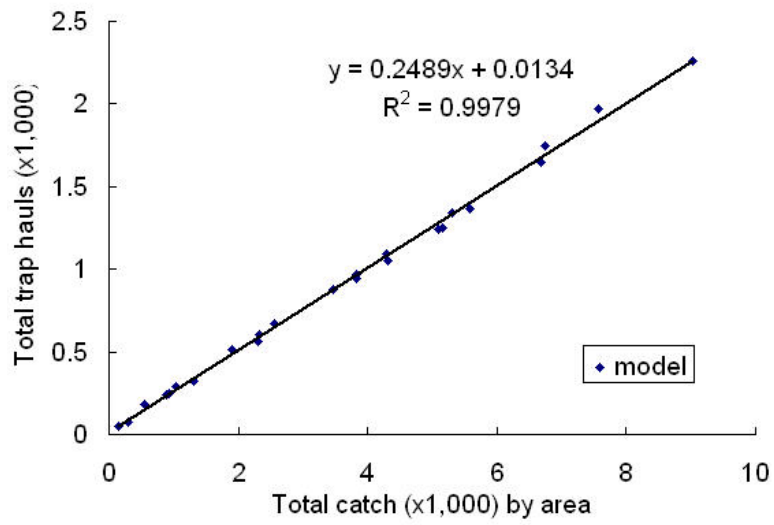

Supplement: pnas_0702241104_5.pdf [file pnas_0702241104_5.pdf]

**a** (without trap cutting)

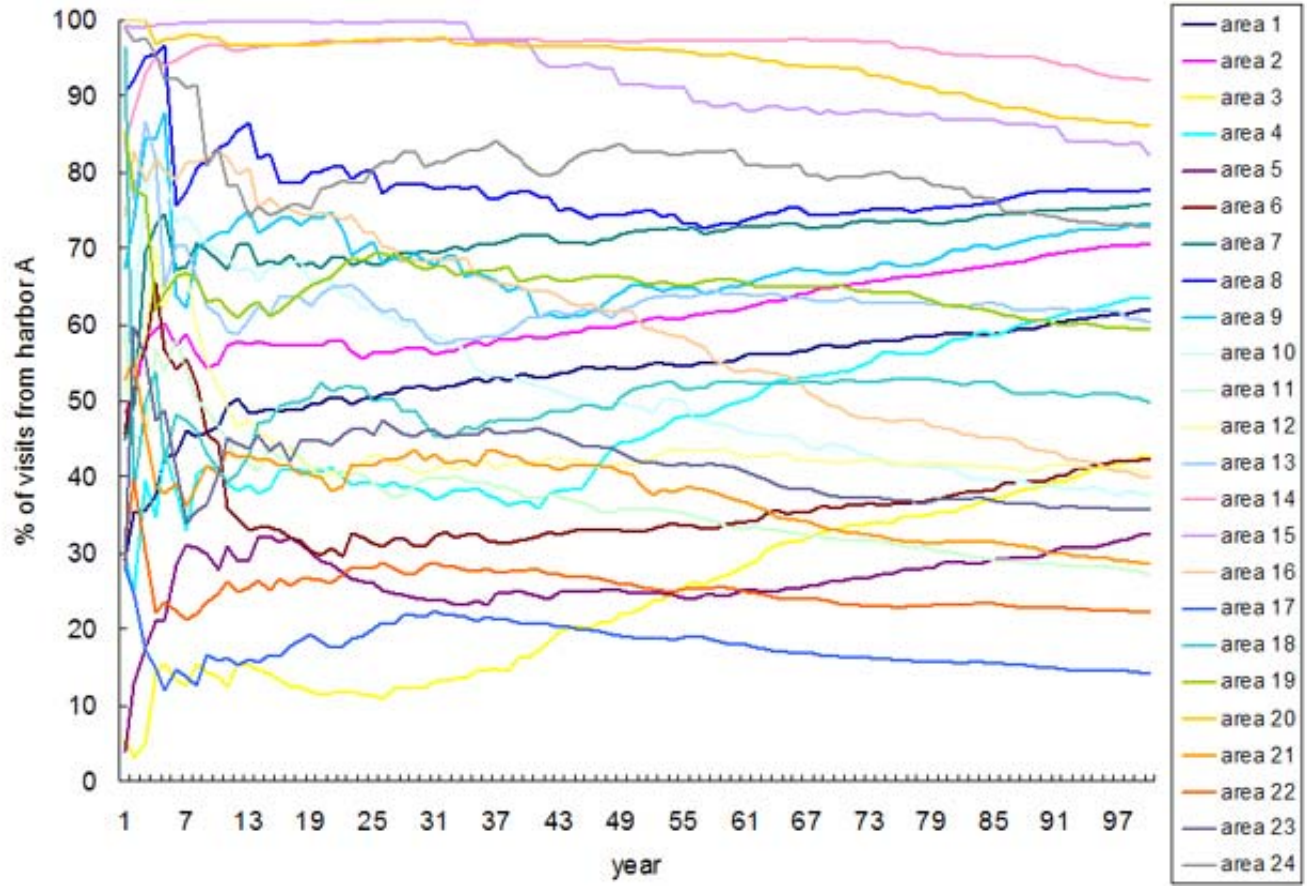

**b** (with trap cutting)

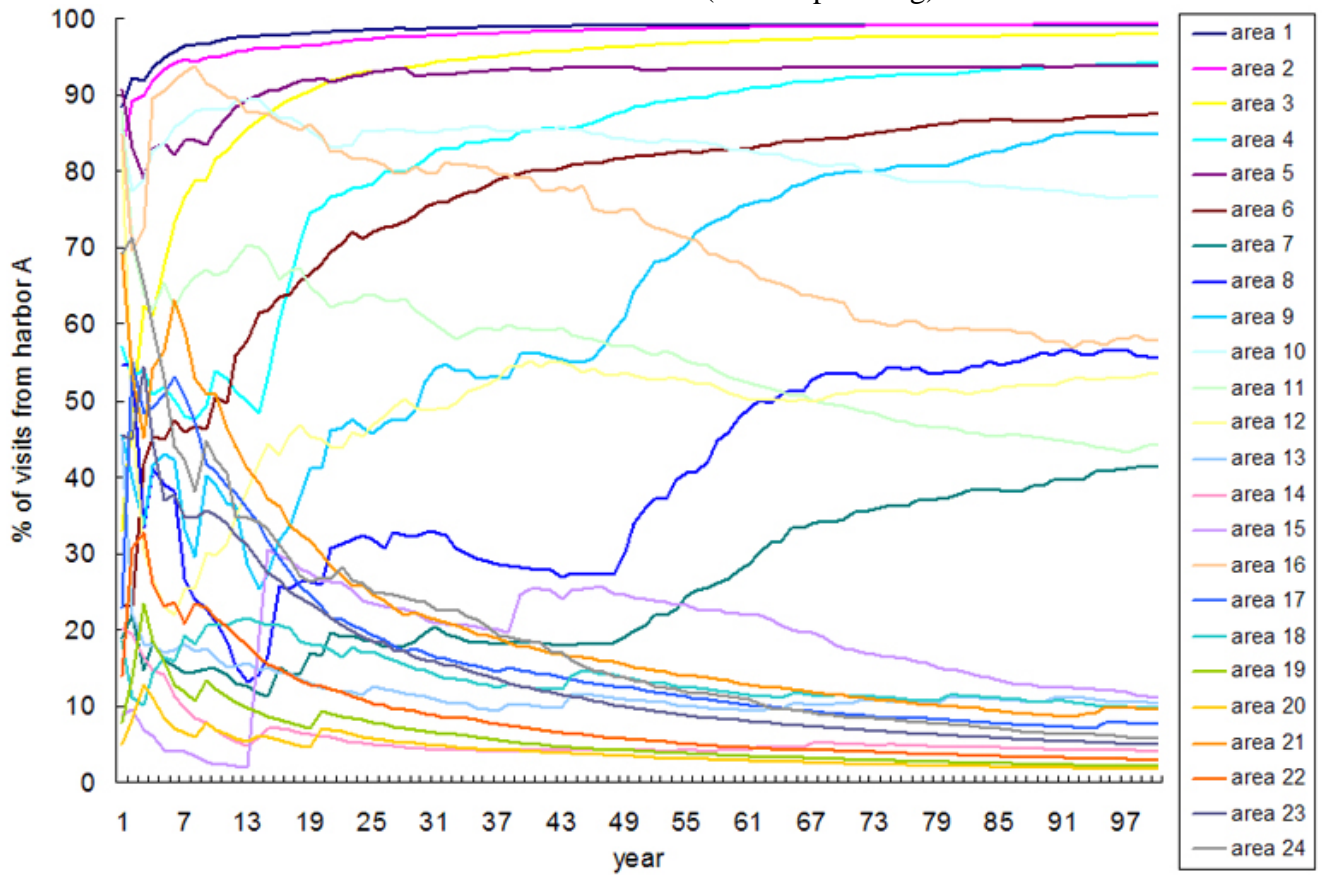

Supplement: pnas_0702241104_6.pdf [file pnas_0702241104_6.pdf]

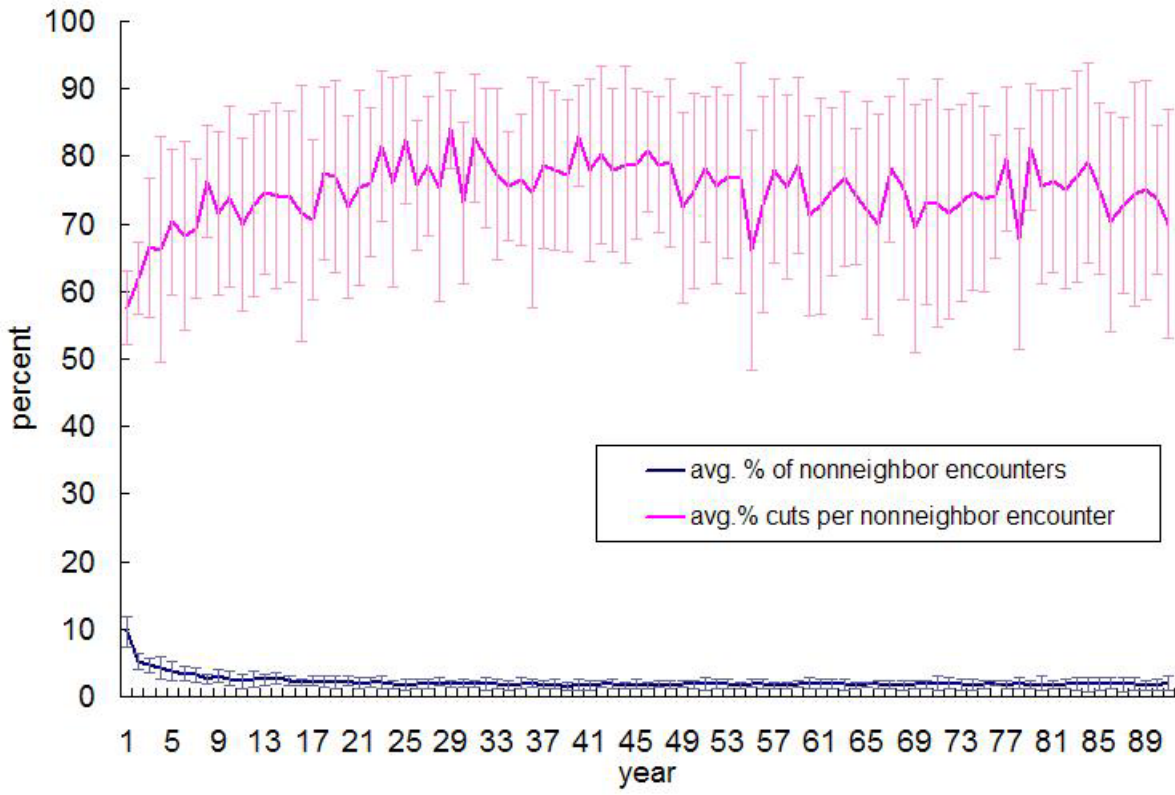

Supplement: pnas_0702241104_7.pdf [file pnas_0702241104_7.pdf]
